# Supplementary material for: Serum cholesterol selectively regulates glucocorticoid sensitivity through activation of JNK
Source: PubMed Central journal article supplement (PMC4191185; doi:10.1530/joe-14-0456), 2014-11

**A**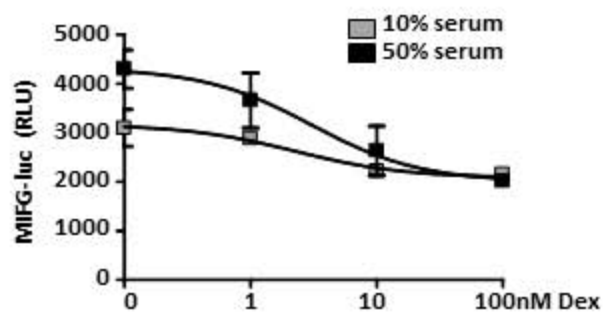**B**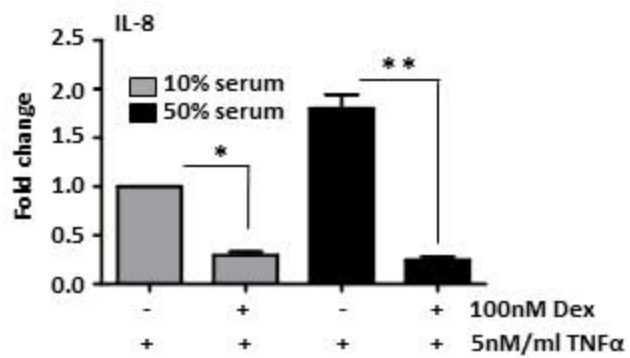

Supplement: supp_JOE-14-0456_Supplementary_figure_4.pdf [file supp_JOE-14-0456_Supplementary_figure_4.pdf]
